# Supplementary material for: Arsenolipids exert less toxicity in a human neuron astrocyte co-culture as compared to the respective monocultures
Source: Royal Society of Chemistry journal article supplement (doi:10.1039/c7mt00036g), 2017-01-01
Supplement: c7mt00036g1.pdf [file c7mt00036g1.pdf]

Electronic Supplementary Information (ESI)

**Arsenolipids exert less toxicity in a human neuron astrocyte co-culture as compared to the respective monocultures**

B. Witt,<sup>a</sup> J. Bornhorst,<sup>a</sup> H. Mitze,<sup>a</sup> F. Ebert,<sup>a</sup> S. Meyer,<sup>a</sup> K. A. Francesconi<sup>b</sup> and T. Schwerdtle<sup>\*a</sup>

Supplementary data

**A**

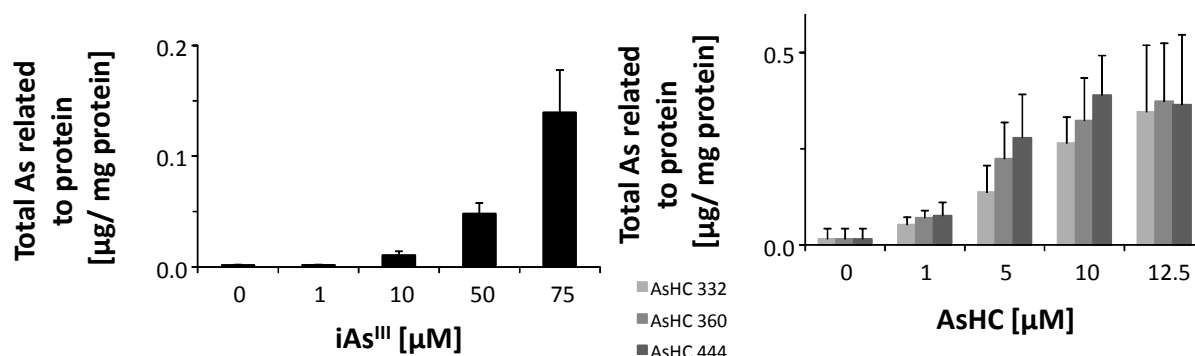

**B**

| arsenic compound   | co-culture                     |                                   | monoculture                     |                                   |
|--------------------|--------------------------------|-----------------------------------|---------------------------------|-----------------------------------|
|                    | neurons<br>[ng As/ mg protein] | astrocytes<br>[ng As/ mg protein] | neurons*<br>[ng As/ mg protein] | astrocytes<br>[ng As/ mg protein] |
| control            | 2 ± 1                          | 1 ± 1                             | 5 ± 5                           | 1 ± 1                             |
| iAs <sup>III</sup> | 29 ± 1                         | 60 ± 20                           | -                               | 10 ± 4                            |
| AsHC 332           | 204 ± 76                       | 617 ± 125                         | 960 ± 280                       | 265 ± 68                          |
| AsHC 360           | 450 ± 98                       | 658 ± 219                         | 3708 ± 1924                     | 323 ± 111                         |
| AsHC 444           | 180 ± 66                       | 349 ± 157                         | 1001 ± 351                      | 389 ± 103                         |

Total arsenic concentrations related to the protein content were measured in the human astrocytes after 48 h of incubation with iAs<sup>III</sup> or AsHCs. Shown are mean values of at least three independent determinations + SD (A). Total arsenic concentrations related to protein content were measured in the co-culture (neurons and astrocytes separately) and in the monocultures (neurons and astrocytes) after incubation with 10 μM of the respective arsenic compound for 48 h. Shown are mean values of at least three independent determinations ± SD. \* results of fully differentiated neurons already published<sup>5</sup> – were not measured due to strong cytotoxic effects (10% cell viability) (B).
